# Supplementary material for: TNF-α protects from exacerbated myocarditis and cardiac death by suppressing expansion of activated heart-reactive CD4+ T cells
Source: PubMed Central journal article supplement — Cardiovasc Res. 2023 Oct 25;120(1):82–94. doi: 10.1093/cvr/cvad158 (PMC10898940; doi:10.1093/cvr/cvad158), 2023-10-25
Supplement: cvad158_supplementary_data.pdf [file cvad158_supplementary_data.pdf]

## 1 **1. Supplemental Methods**

### 2 **1.1 Mice**

3 Creation of the *Tnf*-KO allele: Genomic fragment containing coding regions of exons 2, 3 and 4 of the  
4 mouse *Tnf* gene were deleted using CRISPR/Cas9-mediated non homologous end joining (NHEJ). Two  
5 gRNA were designed to target the *Tnf* intron 1 (IVS1) and its 3'UTR, respectively. The gRNA target  
6 sequences within IVS1-gcaccgcagaaagaagccgt and 3'UTR-agcgggcatggtccacggag were selected for  
7 optimal specificity and cleavage using the CRISPOR online tool <sup>1</sup>. NHEJ events at the gRNA target  
8 sites led to the excision of the genomic fragment containing exons 2, 3 and 4 resulting in a *Tnf*-KO  
9 allele. Mouse genome engineering by direct Cas9/CRISPR zygote electroporation: Cas9/CRISPR  
10 mediated modification of the *Tnf* sequence was carried out by electroporation of fertilized mouse oocytes  
11 essentially as previously described <sup>2</sup>. Frozen 1-cell stage BALB/cByJRj embryos (Janvier labs) were  
12 thawed and cultured briefly in M16 medium (Sigma). Viable embryos were selected and used  
13 immediately for electroporation. All embryo electroporations were performed using the ECM830  
14 electroporator (BTX-Harvard Apparatus). Embryos were washed 2x in OptiMEM medium and  
15 transferred in 10 uL of OptiMEM to a 1mm gap electroporation cuvette containing 10uL of  
16 electroporation solution: 10μLOptiMEM, IVS1 and IVS2 cr:trcr gRNA duplexes (8μM each), Cas9HiFi  
17 V3 protein (IDT) (16μM). For generation of floxed allele, the solution also contained IVS1LoxP and  
18 IVS2LoxP ssODN HR templates (200 ng/μl each). Electroporation was performed with two 3ms pulses  
19 of 30V at 100ms intervals. Embryos that survived the electroporation were transferred on the same day  
20 into the oviducts of 8–16-wk-old pseudopregnant CrI: CD1 (ICR) females (0.5 d used after coitus) that  
21 had been mated with sterile genetically vasectomized males the day before embryo transfer <sup>3</sup>. Pregnant  
22 females were allowed to deliver and raise their pups until weaning age and founders were identified by  
23 PCR analysis of genomic DNA obtained from biopsy samples. TCRM mice were crossed with TNF-α  
24 <sup>-/-</sup> mice to obtain haploinsufficient (**TCRM** x *Tnf*<sup>+/-</sup>) mice. Further breeding was performed by crossing  
25 **TCRM** x *Tnf*<sup>+/-</sup> with *Tnf*<sup>+/-</sup> mice. TCRM (Tg(Tcra,Tcrb)562Biat) mice were kindly provided by Prof.  
26 Dr. Burkhard Ludewig.

### 27 **1.2 Experimental autoimmune myocarditis**

28 Experimental autoimmune myocarditis (EAM) was induced in 6-8 week old BALB/c mice by  
29 subcutaneous injection of 200μg of α-MyHC<sub>614-634</sub> peptide (Ac-RSLKLMATLFSTYASADR-OH,  
30 Caslo, Denmark) emulsified 1:1 with complete Freund's adjuvant (CFA, BD Difco, USA) at day 0 and  
31 7. At day 21 mice were euthanized by cervical dislocation under anesthesia (intraperitoneal injection of  
32 75 mg/kg ketamine). TCR-M were euthanized following the same procedure at age of 6 or 12 weeks and  
33 organs were harvested for histological analysis or cell isolation. For survival analysis, mice were kept  
34 in standard conditions and observed for up to 30 weeks. **The animals were evaluated daily for the**  
35 **following symptoms: response to external stimulus, reduced physical activity, self-isolation, presence**

36 of ruffled coat, presence of stooped posture/curved back, diarrhea, no self-cleaning/dirty coat using 0-2  
37 scale for each parameter. Mice with the cumulative score >6, and/or with at least two symptoms in  
38 severe form and/or weight loss >30% (in the case of EAM model) were euthanized. Mice that were  
39 euthanized or died suddenly underwent autopsy and animals with visible signs of myocarditis were  
40 counted as deceased from myocarditis. All animal experiments followed the guidelines from Directive  
41 2010/63/EU of the European Parliament on the protection of animals used for scientific purposes.

### 42 **1.3 Cell cultures**

43 T lymphocytes and antigen-presenting cells (APC) were isolated from the spleens of EAM and TCR-M  
44 mice. Briefly, single-cell suspension of splenocytes was obtained by gently smashing the spleen through  
45 70µm and 40µm cell strainers and red blood cells were lysed using ACK lysis buffer. Suspension of  
46 splenocytes was enriched in CD4<sup>+</sup> cells using Dynabeads® Untouched™ Mouse CD4 Cells (Invitrogen,  
47 USA) according to the manufacturer's protocol. Cells were labeled with anti-CD11b-APC (1:1000,  
48 M1/70, ThermoFisher, USA), anti-CD4-PE-Cy7 (1:1000, RM4-5, BioLegend, USA), anti-CD44-FITC  
49 (1:500, IM7, BioLegend) and anti-CD62L-PE (MEL-14, BioLegend) in staining buffer (2% FBS, 2mM  
50 EDTA in PBS) and incubated for 15 minutes in 4°C. Cells were FACS sorted as effector T lymphocytes  
51 (Teff) CD4<sup>+</sup>CD11b<sup>-</sup>CD44<sup>+</sup>CD62L<sup>-</sup> and naïve T lymphocytes (Tn) CD4<sup>+</sup>CD11b<sup>-</sup>CD44<sup>low</sup>CD62L<sup>+</sup>. For  
52 APC isolation, the same suspension of splenocytes as used during T cells isolation was labeled using  
53 anti-CD11b-APC (1:1000, M1/70, ThermoFisher), anti-CD45-PE (30-F11, ThermoFisher), and anti-  
54 MHCII-FITC (M5/114.15.2, BioLegend) and FACS sorted as CD45<sup>+</sup>, CD11b<sup>+</sup>, MHCII<sup>+</sup>. Cell sorting  
55 was performed using BD FACSAria II (BD Biosciences, San Jose, CA, USA). Co-cultures of T cells  
56 and APC (100 thousand/ml, ratio 10:1) and splenocytes from TCRM mice (4x10<sup>5</sup> cells/ml) were seeded  
57 in RPMI 1640 with L-glutamine (Corning, USA) supplemented with 10% fetal bovine serum (FBS,  
58 Gibco, Waltham, WA, USA), penicillin-streptomycin (1:100, Gibco) and β-mercaptoethanol (1:1000,  
59 Sigma-Aldrich, Saint Louis, USA). To activate T cells, 10ng/ml of α-MyHC was added to the medium.  
60 After 3 days of co-culture, a conditioned medium was collected and used for further experiments.  
61 Primary cardiac microvascular endothelial cells (cMVECs) were purchased from Cedarlane, Canada,  
62 and cultured in RPMI 1640 supplemented with 10% FBS. Selected experiments were performed on  
63 cMVECs isolated from hearts of 4 weeks old wild-type and Tnf<sup>-/-</sup> mice as described in <sup>4</sup>

### 64 **1.4 Flow cytometry**

65 For measurement of intracellular adhesion molecules, cultured MVECs were labeled with anti-ICAM1-  
66 PE (1:500, YN1/1.7.4, Thermo Fisher Scientific, USA), anti-VCAM1-PE-Cy7 (1:500, 429, Biolegend)  
67 anti-P-selectin-APC (1:500, RMP-1, BioLegend) and anti-CD31-FITC (1:500, 390, ThermoFisher) in  
68 staining buffer (1% FBS, 1mM EDTA in PBS). To analyze heart-infiltrating leukocytes, hearts were  
69 excised, mechanically dissected and enzymatically digested as described previously<sup>5</sup>. Next, cells were  
70 labeled with anti-CD3-FITC (1:250, 17A2, ThermoFisher), anti-CD4-PE-Cy7 (1:1000, RM4-5,

71 BioLegend), anti-CD11b-PE (1:500, M1/70, BioLegend), anti-B220-APC-Cy7(RA3-6B2, BioLegend),  
72 anti-CD49b-APC (DX5, 1:500, BioLegend) anti-CD45-BV 421 (30-F11, 1:500, BioLegend) or with  
73 anti-CD11b-PE (1:500, M1/70, BioLegend), anti-Ly6C-BV 421 (1:500, HK1.4, BioLegend), anti-  
74 Ly6G-PECy7 (1:500, 1A8-Ly6g, Invitrogen), anti-CD36-APC (1:300, HM36, Invitrogen), and anti-  
75 CD11c-PerCp (1:300, N418, BioLegend). The proliferation of T cells was measured using CellTrace™  
76 CFSE Cell Proliferation Kit (Thermofisher). Analysis of apoptosis was performed using Annexin-V-  
77 FITC (Thermofisher) and propidium iodide (Thermofisher). All samples were suspended in flow  
78 cytometry buffer (2% FBS, 1 mM EDTA in PBS) prior to cytometric analysis. Samples were analyzed  
79 using BD FACSCanto™ II analyzer (BD Biosciences), and the data were analyzed with the FlowJo  
80 software (Tree Star, FlowJo X 10.0.7., Ashland, AS, USA).

### 81 **1.5 Adhesion assay**

82 BioFlux 200 48-well plates 0-20 dyn (Fluxion, USA) capillaries were coated with 0.4% gelatin (Merck,  
83 Germany) and 25µg/ml human fibronectin (Merck, Germany) solution in a growth medium for 24h in  
84 37°C. MVECs suspension in growth medium ( $2.5 \times 10^6$  cells/ml) was loaded into capillaries using BioFlux  
85 200 system (Fluxion, USA). Cells were grown inside capillaries until a confluent monolayer was  
86 formed. For adhesion assay, splenocytes suspension from 4 weeks old BALB/c mice labeled with  
87 CellTrace™ CFSE (ThermoFisher, USA) was used at a concentration of  $3 \times 10^5$  cells/ml. Splenocyte  
88 suspension was continuously pushed through the MVEC-coated capillaries for 30 minutes at  $1 \text{ dyn/cm}^3$   
89 and cell adhesion was monitored with a fluorescence microscope (LS720, Etaluma, USA). The analysis  
90 of rolling parameters was performed on recorded time-lapse videos. The rolling distance was estimated  
91 on randomly chosen 50 events (start of rolling to firmly adhering) using ImageJ software (Version 1.52a,  
92 NIH, Bethesda, MA, USA).

### 93 **1.6. ELISA**

94 Levels of TNF- $\alpha$ , IL-6 and GM-CSF were measured in medium conditioned of T lymphocytes using  
95 ElisaMax kits (BioLegend) according to manufacturer instructions and analyzed on M200 PRO plate  
96 reader (TECAN Instruments, Switzerland). TNF- $\alpha$  levels in cMVECs were measured in lysates prepared  
97 using-RIPA buffer supplemented with protease inhibitors (ThermoFisher Scientific, USA). In each  
98 measurement 100µg of protein was used, protein levels were determined using Pierce™ BCA Protein  
99 Assay Kit (ThermoFisher, USA).

### 100 **1.8 Histology**

101 Mouse hearts were fixed in 4% formalin and embedded in paraffin. Standard hematoxylin/eosin staining  
102 was performed to visualize and grade the size of leukocyte infiltrates. Myocarditis severity was assessed  
103 at day 21 in EAM mice, 4 weeks old TCRM mice, and in TCRM displaying serious symptoms of health  
104 worsening. Myocarditis severity was scaled from 0 to 6 (0 = no leukocyte infiltrates; 1 = small foci of

105 leukocytes; 2 = larger foci of >100 inflammatory cells; 3 = more than 10% of a cross-section involved;  
106 4 = more than 30% of a cross-section involved, 5 = more than 50% of a cross-section involved. An  
107 experienced researcher performed a blinded assessment of the histological slides. Fibrosis was  
108 visualized using Trichrome Stain (Masson) Kit (Sigma) and expressed as a percentage of the cross-  
109 sectional area involved. Cardiomyocyte hypertrophy was assessed using Wheat Germ Agglutinin, Alexa  
110 Fluor™ 488 Conjugate (ThermoFisher) staining. The area of 100 randomly chosen cardiomyocytes with  
111 a visible nucleus from each heart was measured using ImageJ software and expressed as the mean area.

## 112 **1.9 Echocardiography**

113 Transthoracic echocardiography was performed using a Vevo 2100 system equipped with a 30-MHz  
114 transducer (VisualSonics). Anaesthesia was induced by 5% isoflurane and confirmed by the absence of  
115 the withdrawal reflex of one of the hind paws. During echocardiogram acquisition isoflurane was  
116 reduced to 1.5-2%. Each animal was placed in a supine position on a prewarmed platform. The limbs  
117 were taped over the metal ECG leads to enable continuous monitoring of the heart rate and respiration.  
118 Then, the prewarmed echo transmission gel was applied to the hairless chest. The heart was imaged in  
119 the bi-dimensional (2-D) mode, in the parasternal long-axis (PSLAX), short-axis (SAX) and apical 4-  
120 chamber views. For analysis of left ventricular end-diastolic volume and left the ventricular end-systolic  
121 volume the endocardium of the left ventricle was traced at both diastole and systole. An integrated  
122 software tool (LV-Trace) was used for single-plane PSLAX analysis. Collected parameters include:  
123 ejection fraction, stroke volume, left ventricular end-systolic diameter and fractional shortening.

## 124 **1.10 Assessment of global cardiac function with MRI**

125 All animals were scanned during daytime (0800 -1600), in a pseudo-random order. During the  
126 experiment, mice were anesthetized using isoflurane (1.7 vol%) in an oxygen and air (1:2) mixture. A  
127 tail-vein catheter pre-filled with heparinized saline (0.9% NaCl + 50 IU/ml Heparin) was placed to  
128 administrate pharmacological agents. Body temperature was monitored with an endorectal probe and  
129 maintained in the range of 35.5°C–36.5°C. All MR experiments were recorded with a 9.4T small animal  
130 MRI scanner (Bruker BioSpec, Ettlingen, Germany) equipped with a 1000 mT/m gradient coil with a  
131 maximum slew rate of 3500 T/m/s. A 36 mm quadrature volume coil was used for RF excitation and  
132 detection. To evaluate the global cardiac function. the bright-blood cine images were collated in 6–7  
133 contiguous slices covering the whole ventricle volume using a flow-compensated, prospectively gated  
134 gradient-echo FLASH sequence with the following parameters: FOV 30 x 30 mm<sup>2</sup>, acquisition matrix:  
135 192 x 192, TE/TR = 2.3/5 ms, slice thickness = 1 mm, number of averages = 4, flip angle = 11°  
136 Depending on the heart rate, between 22 and 24 cine frames were acquired. The filling and ejection rates  
137 of LV were obtained with a high-frame-rate, retrospectively gated cine FLASH sequence (IgFLASH) in  
138 a mid-ventricular, short-axis slice. The following acquisition parameters were used: FOV 30 x 30 mm,  
139 acquisition matrix 128 x 128, TE/TR = 1.3/4.2 ms, slice thickness = 1 mm, number of repetitions =

1200, flip angle = 11°. The data were reconstructed to 60 frames per cardiac cycle using a vendor-  
provided macro (ParaVision 6.0.1, Bruker BioSpin, Ettlingen, Germany). Tagged cine images were  
obtained using a double-gated FLASH sequence (TE/TR 1.5/4.8 ms, flip angle 11°, FOV 30 x 30 mm<sup>2</sup>,  
matrix 192 x 192, slice thickness 1.0 mm, 16 repetitions, 20–25 frames) with a spatial modulation of  
magnetization (SPAMM) module for tag generation (square tags: line thickness 0.2 mm, span 0.6 mm).  
Cardiac reserve was estimated with the same sequence as for high-frame-rate LV function with 300  
repetitions and reconstruction to 30 frames<sup>2</sup>. Dobutamine hydrochloride (Sigma-Aldrich) was dissolved  
in 0.9% NaCl at concentration of 0.5 mg/ml and injected i.p. at a dose of 2 mg/kg (typical bolus volume  
~ 100 ul)

149

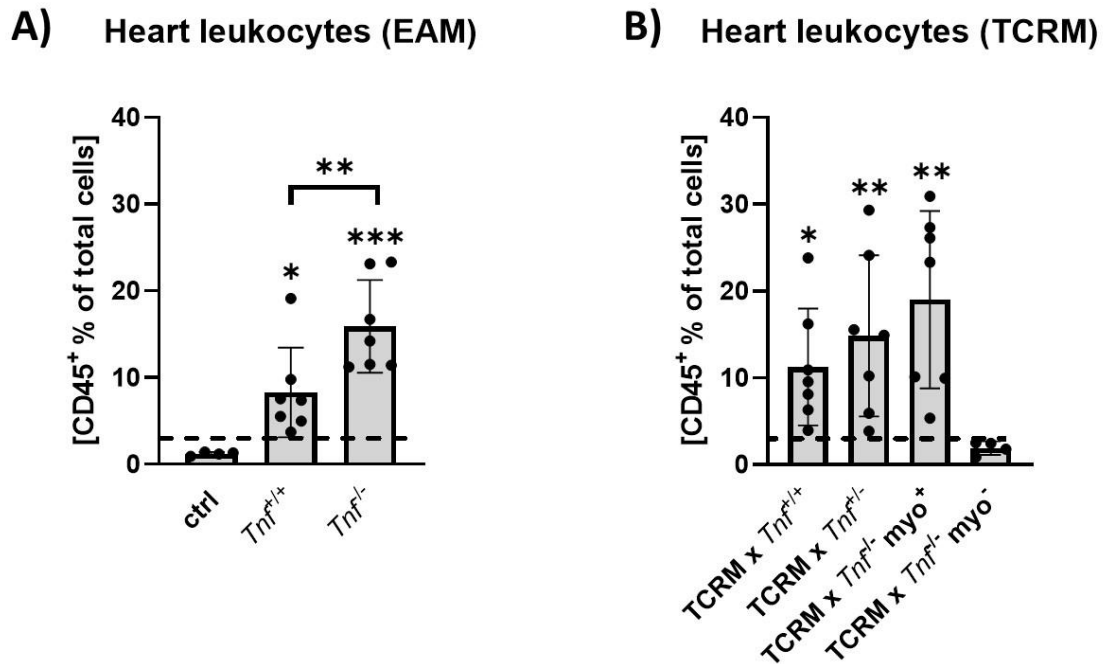

151

152 **Supplementary Figure 1.** Flow cytometry analysis of leukocytes in hearts from EAM and TCRM  
 153 models. Panel (A) shows the percentage of CD45<sup>+</sup> leukocytes in the heart of healthy wild-type mice  
 154 (ctrl) and immunized wild-type (*Tnf*<sup>+/+</sup>) and myocarditis-positive TNF- $\alpha$  deficient (*Tnf*<sup>-/-</sup>) mice at d19  
 155 from immunization. In panel (B) analysis of 6-weeks old hearts of TCRM (TCRM x *Tnf*<sup>+/+</sup>), TNF- $\alpha$   
 156 haploinsufficient TCRM (TCRM x *Tnf*<sup>+/-</sup>) and TNF- $\alpha$  deficient TCRM (TCRM x *Tnf*<sup>-/-</sup>) is presented.  
 157 TCRM x *Tnf*<sup>-/-</sup> mice were split into myocarditis positive (myo<sup>+</sup>) and myocarditis negative (myo<sup>-</sup>) groups.  
 158 A threshold discriminating myocarditis-positive and myocarditis-negative hearts is indicated by a dotted  
 159 line at 3% of CD45<sup>+</sup> cells. *p* values calculated with Kruskal-Wallis followed by Dunn's test against ctrl  
 160 in (A) and one-way ANOVA followed by multiple comparison using the Fisher's LSD test against  
 161 TCRM x *Tnf*<sup>-/-</sup> myo<sup>-</sup> in (B). ns *p*>0.05, \**p*<0.05, \*\* *p*<0.01, \*\*\* *p*<0.001.

162

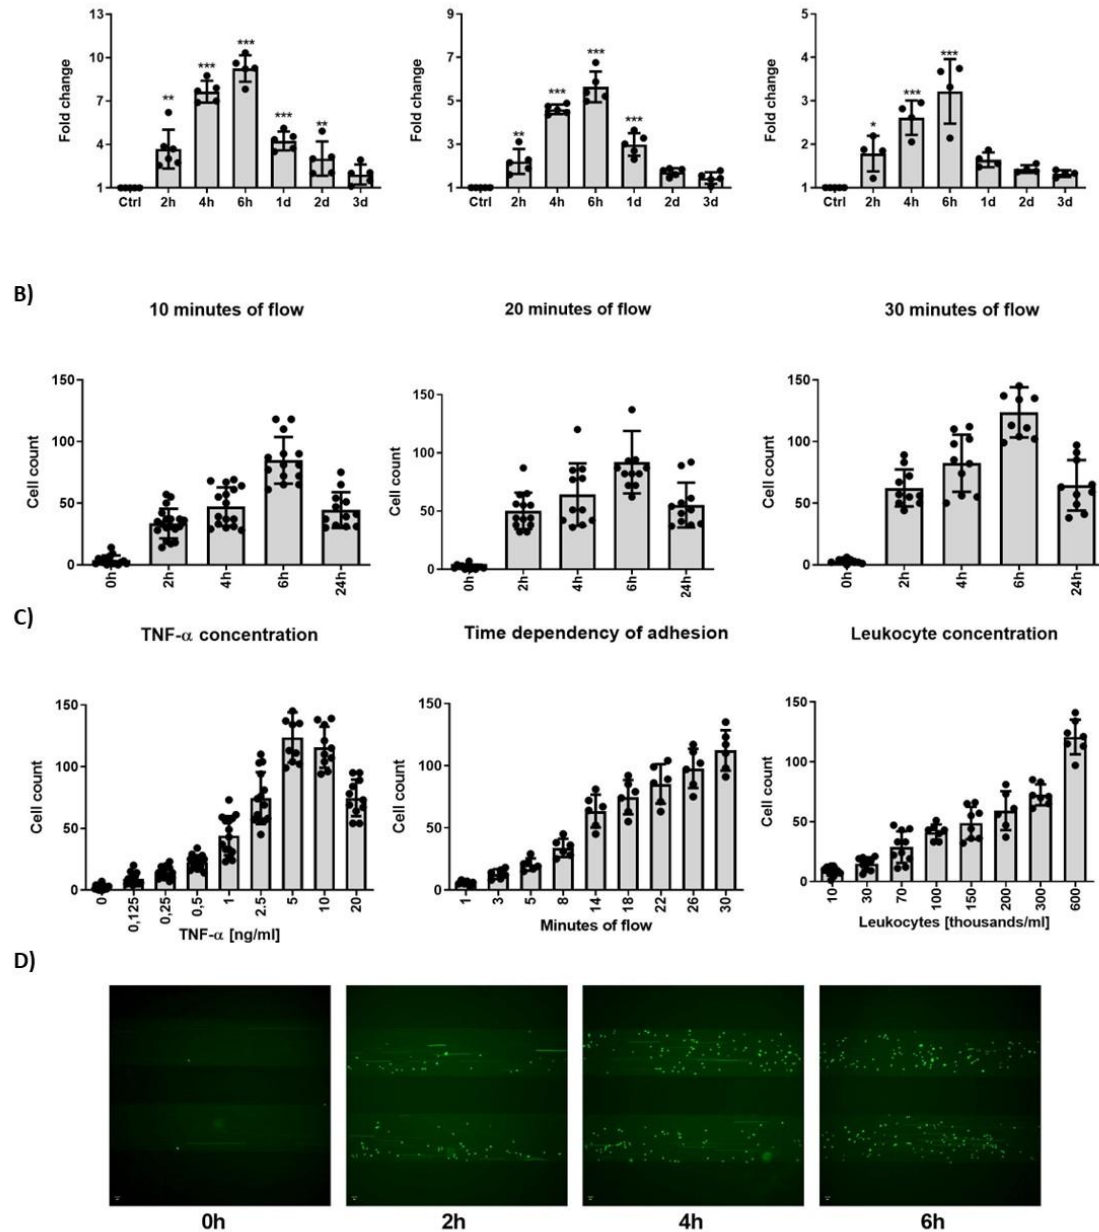

163

164 **Supplementary Figure 2.** Endothelial activation by TNF- $\alpha$ . cMVECs were stimulated with 5ng/ml  
 165 TNF- $\alpha$  for up to 3 days and surface expression levels of ICAM-1, VCAM-1 and p-selectin are shown in  
 166 panel (A). Panel (B) demonstrates the time-dependency of TNF- $\alpha$  stimulation (5ng/ml) on the number  
 167 of leukocytes binding to cMVECs in shear flow conditions and representative microphotographs of each  
 168 timepoint are presented in (C). Panel (D) shows the dependency of leukocyte adhesion on the  
 169 concentration of TNF- $\alpha$  used during stimulation, duration of the experiment and concentration of  
 170 leukocytes used in the experiment. \* $p < 0.05$ , \*\*  $p < 0.01$ , \*\*\*  $p < 0.001$  calculated by one-way ANOVA  
 171 followed by Fisher's LSD post-hoc test versus the control group.



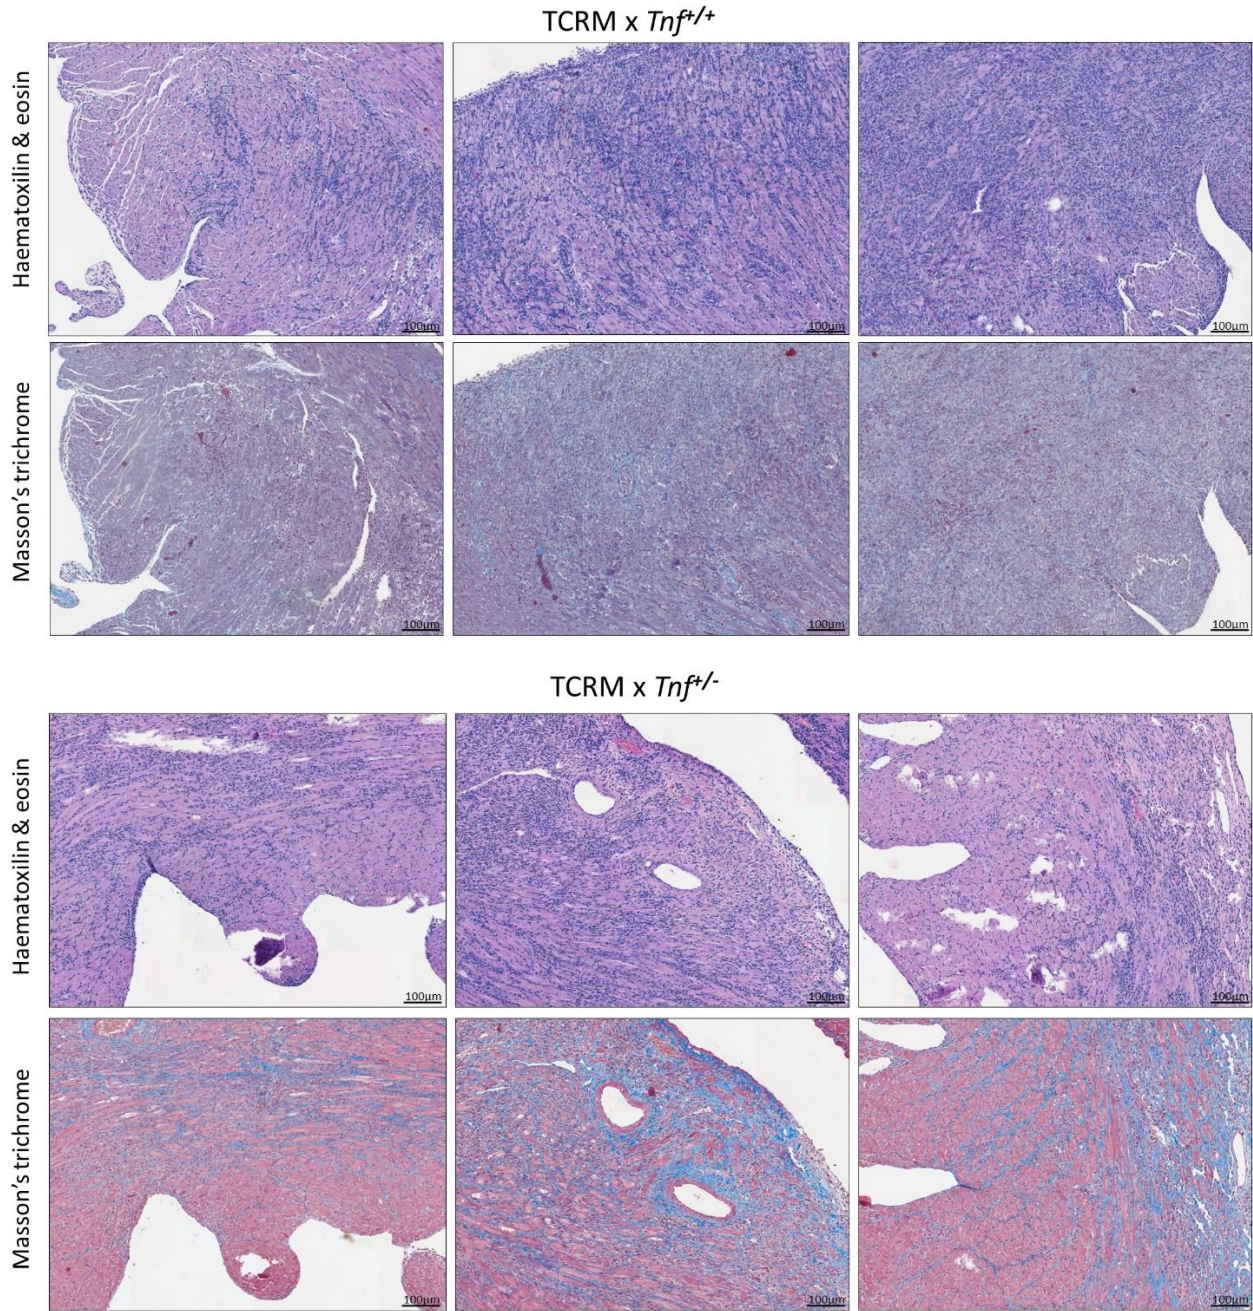

172

173 **Supplementary Figure 3.** Co-occurrence of inflammation and fibrosis in the TCRM model. The panel  
 174 shows representative haematoxylin and eosin and Masson's trichrome staining (where blue indicates  
 175 collagen deposition) for TCRM x *Tnf*<sup>+/+</sup> (inflammation without fibrosis) and TCRM x *Tnf*<sup>+/-</sup>  
 176 (inflammation with fibrosis) on constitutive heart sections.



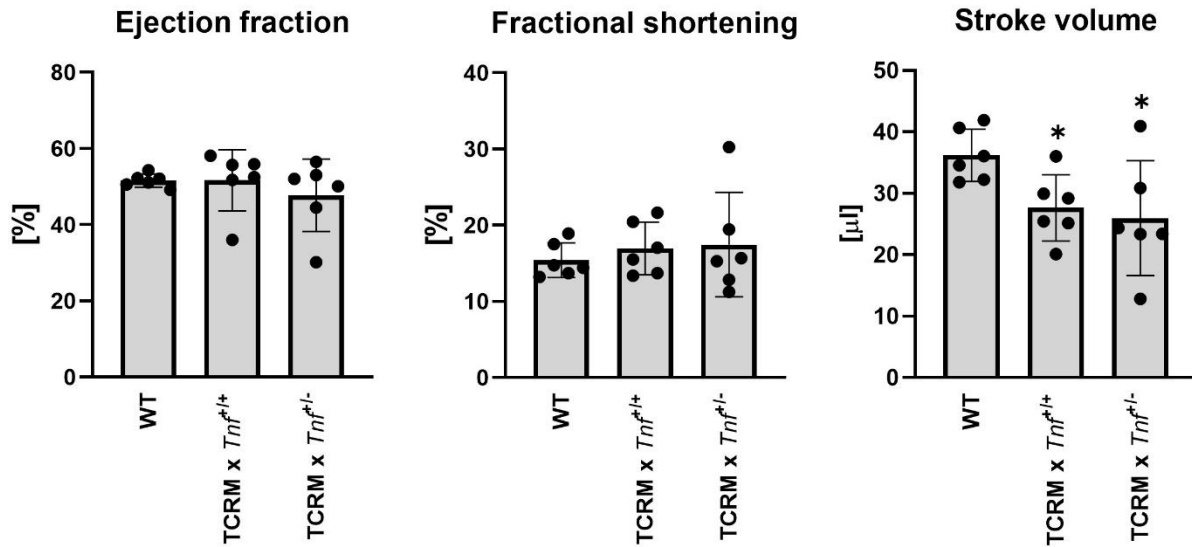

177

178 **Supplementary Figure 4.** Echocardiography of cardiac functions in 6-weeks old TCRM mice. The  
 179 analysis included sex-matched wild-type (WT), TCRM (TCRM x *Tnf*<sup>+/+</sup>) and TNF- $\alpha$  haploinsufficient  
 180 TCRM (TCRM x *Tnf*<sup>-/-</sup>) mice. The mean values of ejection fraction, fractional shortening and stroke  
 181 volume are presented. \*p<0.05, \*\* p<0.01, \*\*\* p <0.001 calculated by one-way ANOVA followed by  
 182 multiple comparison using Fisher's LSD test

183

184

185

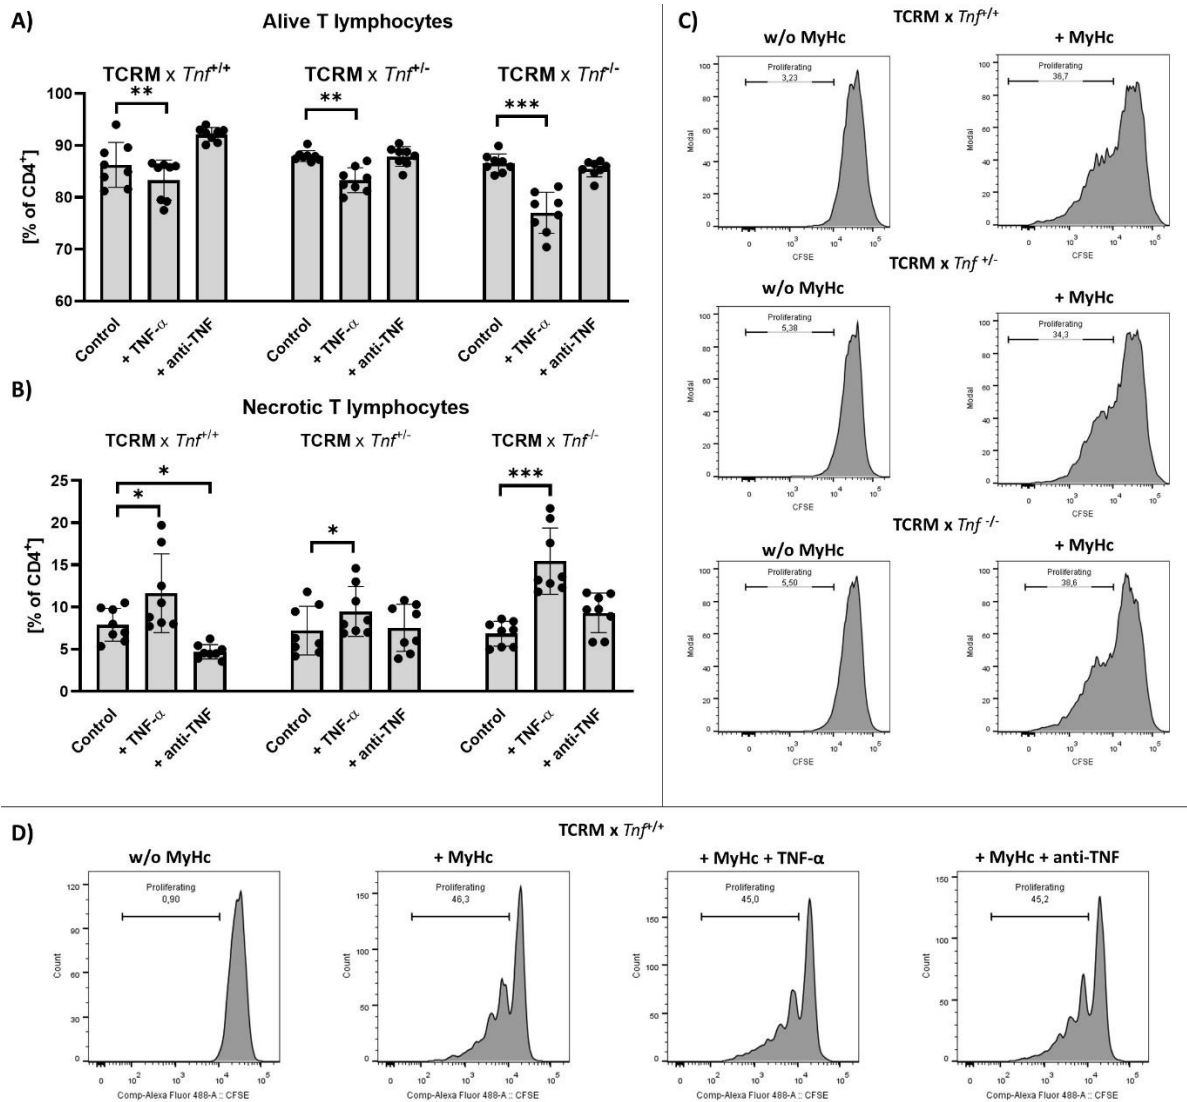

186

187 **Supplementary Figure 5.** Proliferation and survival of T lymphocytes from TCRM model. Splenocytes  
 188 were isolated from 6 weeks old wildtype (TCRM x *Tnf*<sup>+/+</sup>), haploinsufficient (TCRM x *Tnf*<sup>+/-</sup>) and  
 189 deficient in TNF- $\alpha$  (TCRM x *Tnf*<sup>-/-</sup>) TCRM mice. In panels (A) and (B) T cells and APC were co-  
 190 cultured for 3 days in the presence of  $\alpha$ -MyHc peptide alone (control), with the peptide and 5 ng/ml  
 191 TNF- $\alpha$  (+TNF- $\alpha$ ) or the peptide and 10 $\mu$ g/ml of TNF- $\alpha$  neutralizing antibody (+ anti-TNF). Cells were  
 192 stained with propidium iodide and Annexin V to determine viability, n=8. In panel (C) representative  
 193 histograms showing proliferation of T lymphocytes co-cultured with APCs in the presence or absence  
 194 of  $\alpha$ -MyHc peptide. Panel (D) shows representative proliferation of T lymphocytes from TCRM x *Tnf*<sup>+/+</sup>  
 195 mice in response to 5 ng/ml TNF- $\alpha$  (+TNF- $\alpha$ ) or 10  $\mu$ g/ml of TNF- $\alpha$  neutralizing antibody (+ anti-TNF)  
 196 treatment. \*p<0.05, \*\* p<0.01, \*\*\* p <0.001 calculated by one-way ANOVA followed by multiple  
 197 comparison using Fisher's LSD test

198

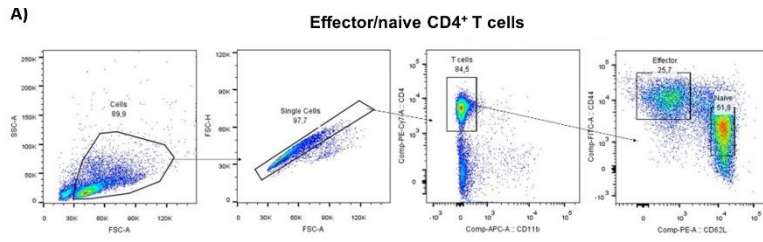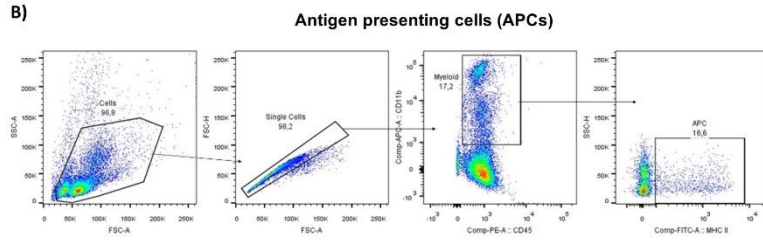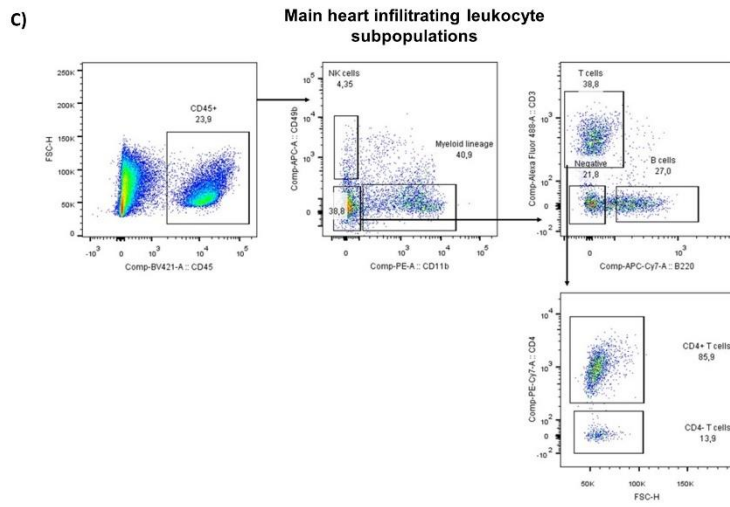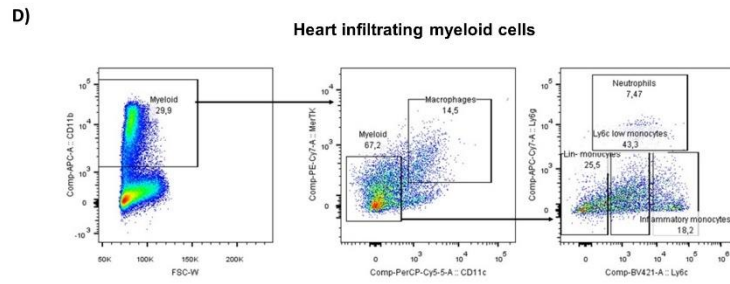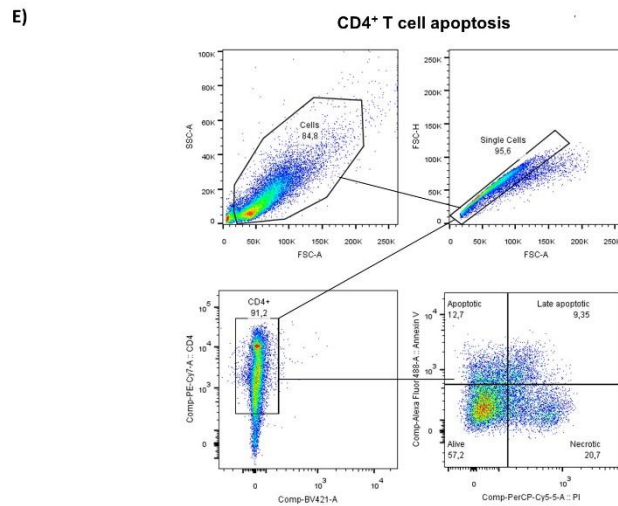

200 **Supplementary figure 6.** Gating strategy used for the FACS and flow cytometry analysis. **A)** Naïve  
201 and effector T cells gating strategy used in FACS and analysis, **B)** gating strategy used for FACS of  
202 antigen-presenting cells, **C)** gating strategy used in the analysis of main subsets of heart infiltrating  
203 leukocytes and T cell subpopulations, **D)** gating strategy used in the analysis of heart infiltrating subsets  
204 of the myeloid lineage, **E)** gating strategy used for the determination of T cell activation-induced cell  
205 death (AICD).

206

207

- 208 1. Concordet JP, Haeussler M. CRISPOR: Intuitive guide selection for CRISPR/Cas9 genome  
209 editing experiments and screens. *Nucleic Acids Res*; 2018;**46**:W242–W245.
- 210 2. Wang J, Thingholm LB, Skiecevičie J, Rausch P, Kummen M, Hov JR, Degenhardt F, Heinsen FA,  
211 Rühlemann MC, Szymczak S, Holm K, Esko T, Sun J, Pricop-Jeckstadt M, Al-Dury S, Bohov P,  
212 Bethune J, Sommer F, Ellinghaus D, Berge RK, Hübenthal M, Koch M, Schwarz K, Rimbach G,  
213 Hübbe P, Pan WH, Sheibani-Tezerji R, Häsler R, Rosenstiel P, D’Amato M, et al. Genome-wide  
214 association analysis identifies variation in Vitamin D receptor and other host factors  
215 influencing the gut microbiota. *Nat Gen*; 2016;**48**:1396–1406.
- 216 3. Haueter S, Kawasumi M, Asner I, Brykczynska U, Cinelli P, Moisyadi S, Bürki K, Peters AHFM,  
217 Pelczar P. Genetic vasectomy - Overexpression of Prm1-EGFP fusion protein in elongating  
218 spermatids causes dominant male sterility in mice. *Genesis*; 2010;**48**:151–160.
- 219 4. Rolski F, Czepiel M, Tkacz K, Fryt K, Siedlar M, Kania G. T Lymphocyte-Derived Exosomes  
220 Transport MEK1 / 2 and ERK1 / 2 and Induce NOX4-Dependent Oxidative Stress in Cardiac  
221 Microvascular Endothelial Cells. *Oxid Med Cell Longev* 2022;**2022**:1–17.
- 222 5. Tkacz K, Rolski F, Czepiel M, Działo E, Siedlar M, Eriksson U, Kania G, Błyszczuk P.  
223 Haploinsufficient Rock1+/- and Rock2+/- Mice Are Not Protected from Cardiac Inflammation  
224 and Postinflammatory Fibrosis in Experimental Autoimmune Myocarditis. *Cells* 2020;**9**:700.

225
